# Supplementary material for: Serum Creatine, Not Neurofilament Light, Is Elevated in CHCHD10-Linked Spinal Muscular Atrophy
Source: PubMed Central journal article supplement (PMC8891230; doi:10.3389/fneur.2022.793937), 2022-02-17

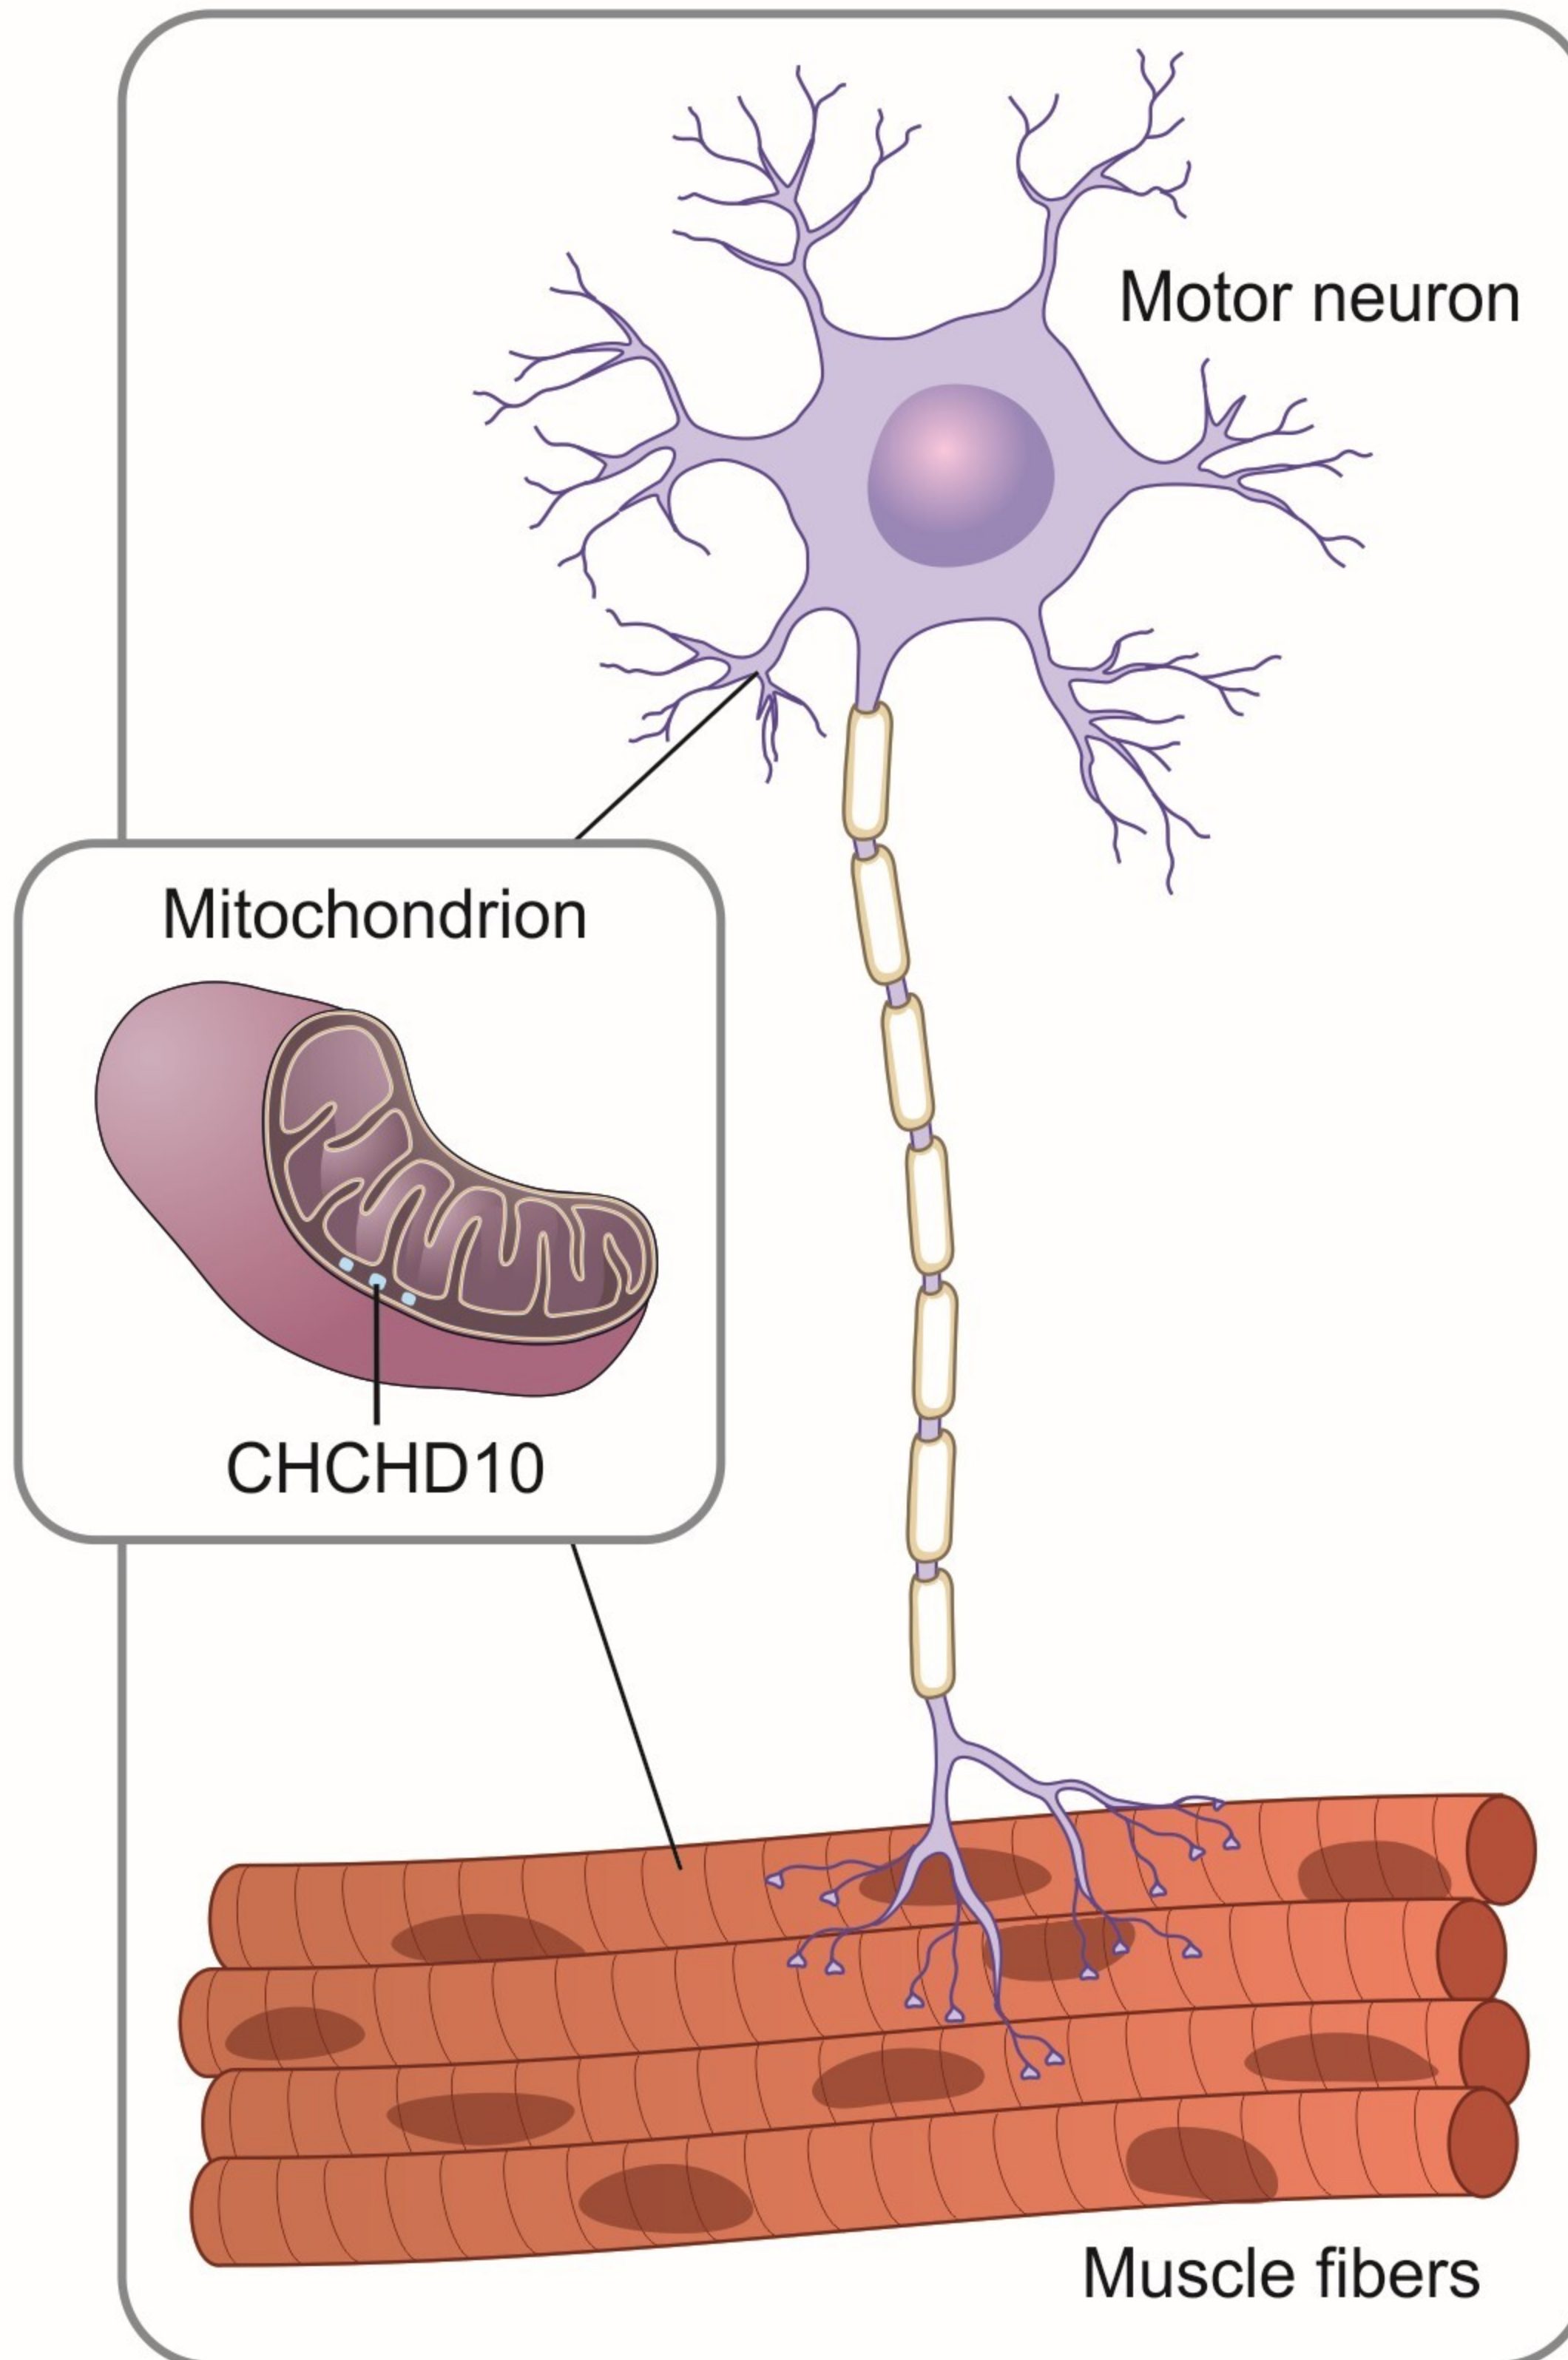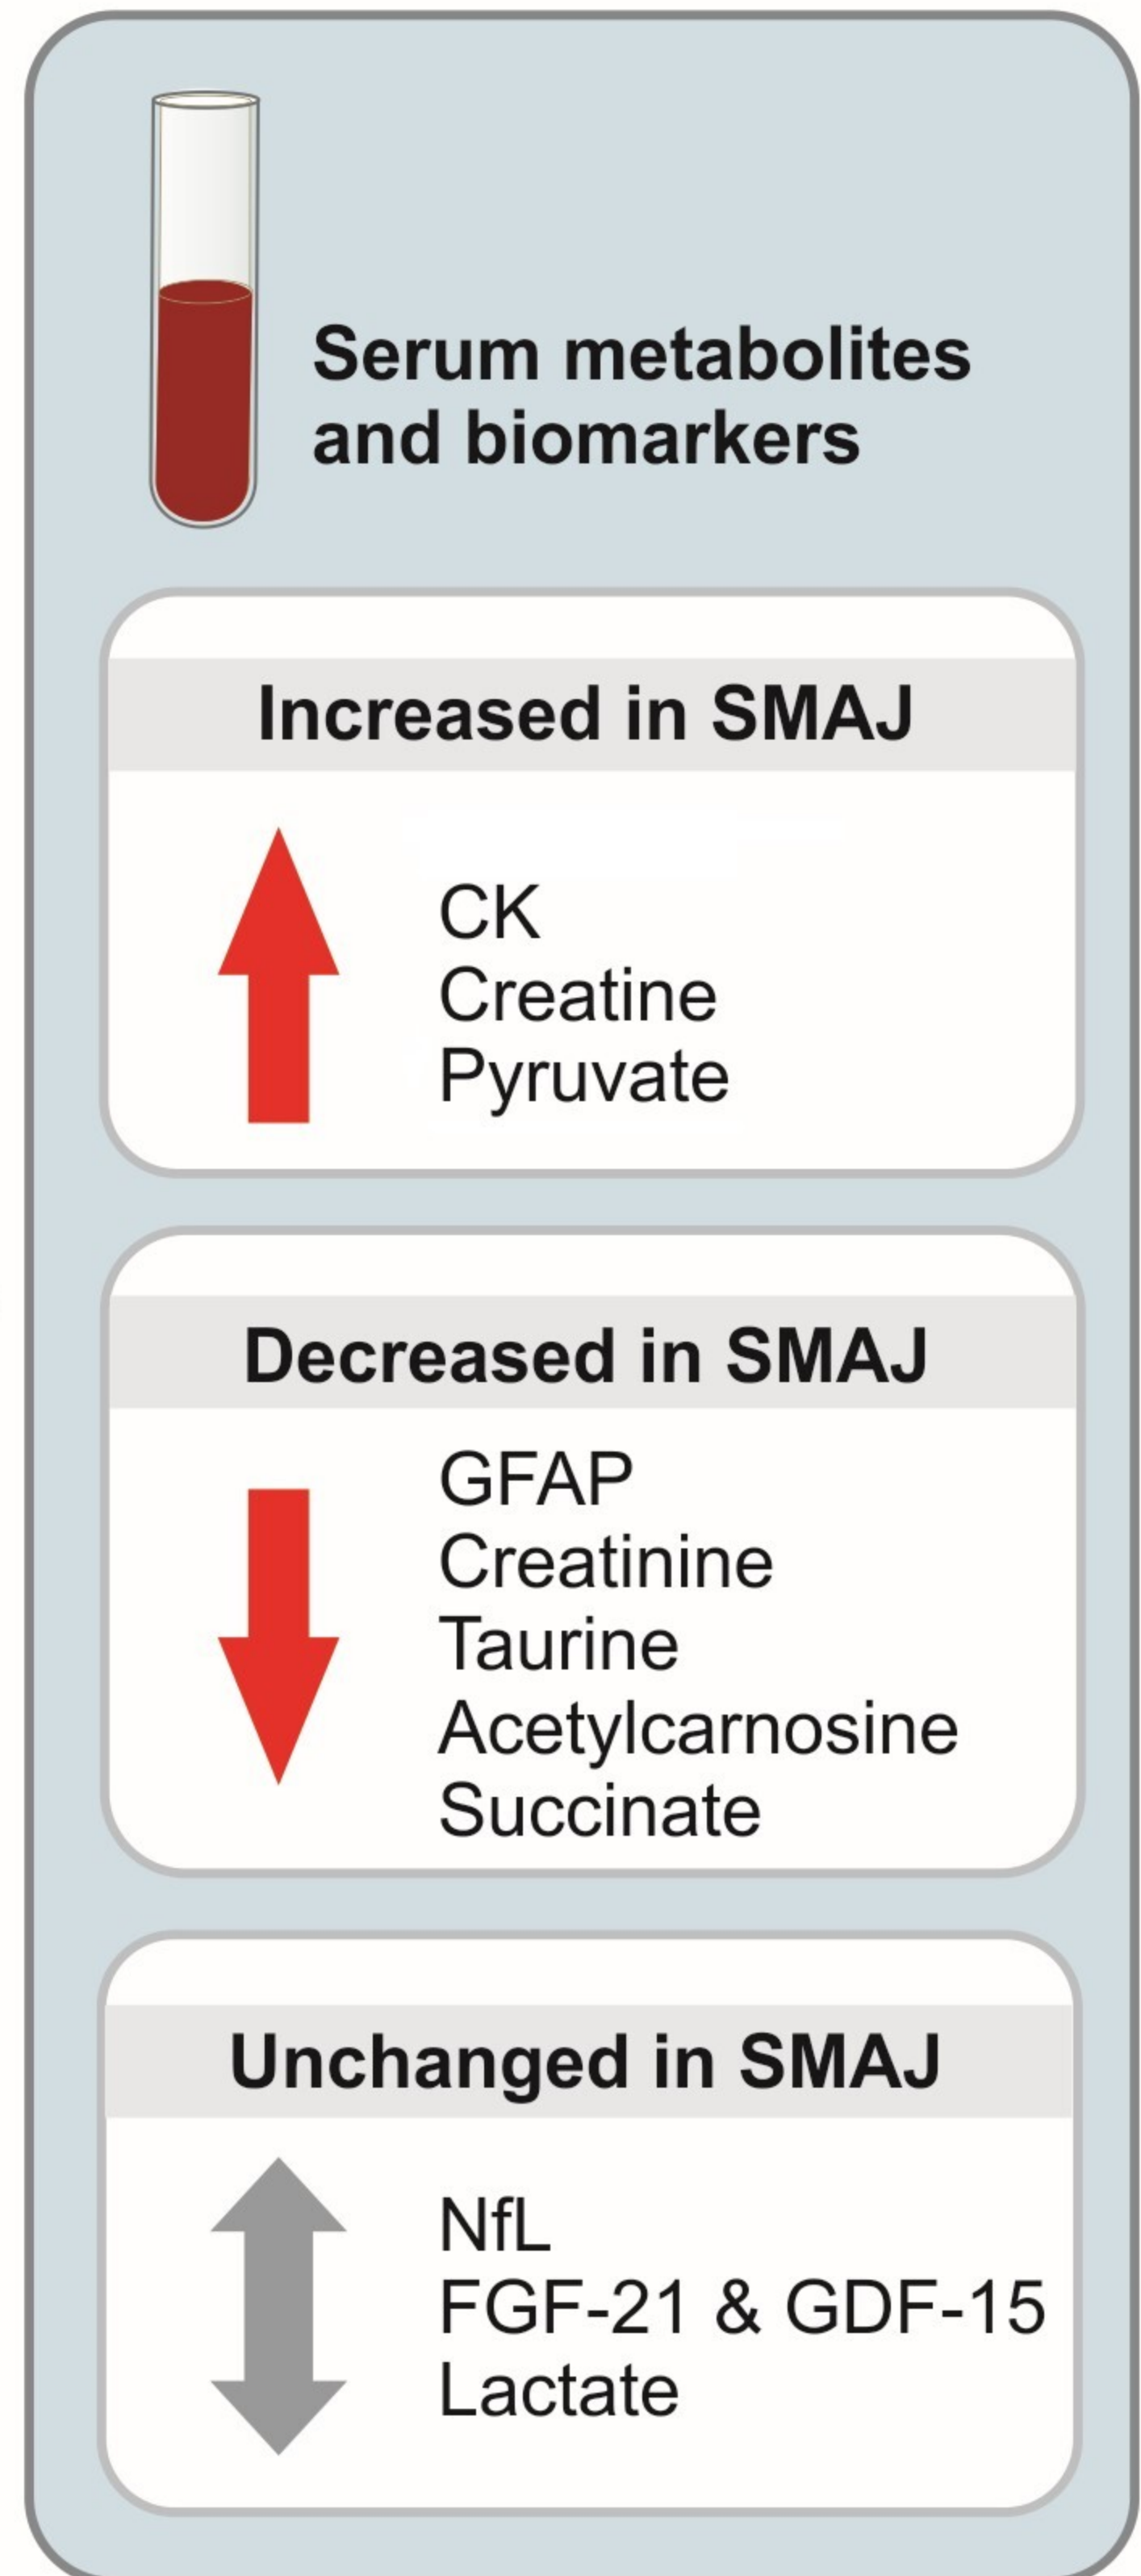

Supplement: Image_1.pdf [file Image_1.pdf]
